# Supplementary material for: A High Performance Computing Implementation of Iterative Random Forest for the Creation of Predictive Expression Networks
Source: Preprints.org preprint supplement (doi:10.20944/preprints201910.0360.v1), 2019-10-31
Supplement: Supplementary file 1 [file supplementary]

Supplementary Information


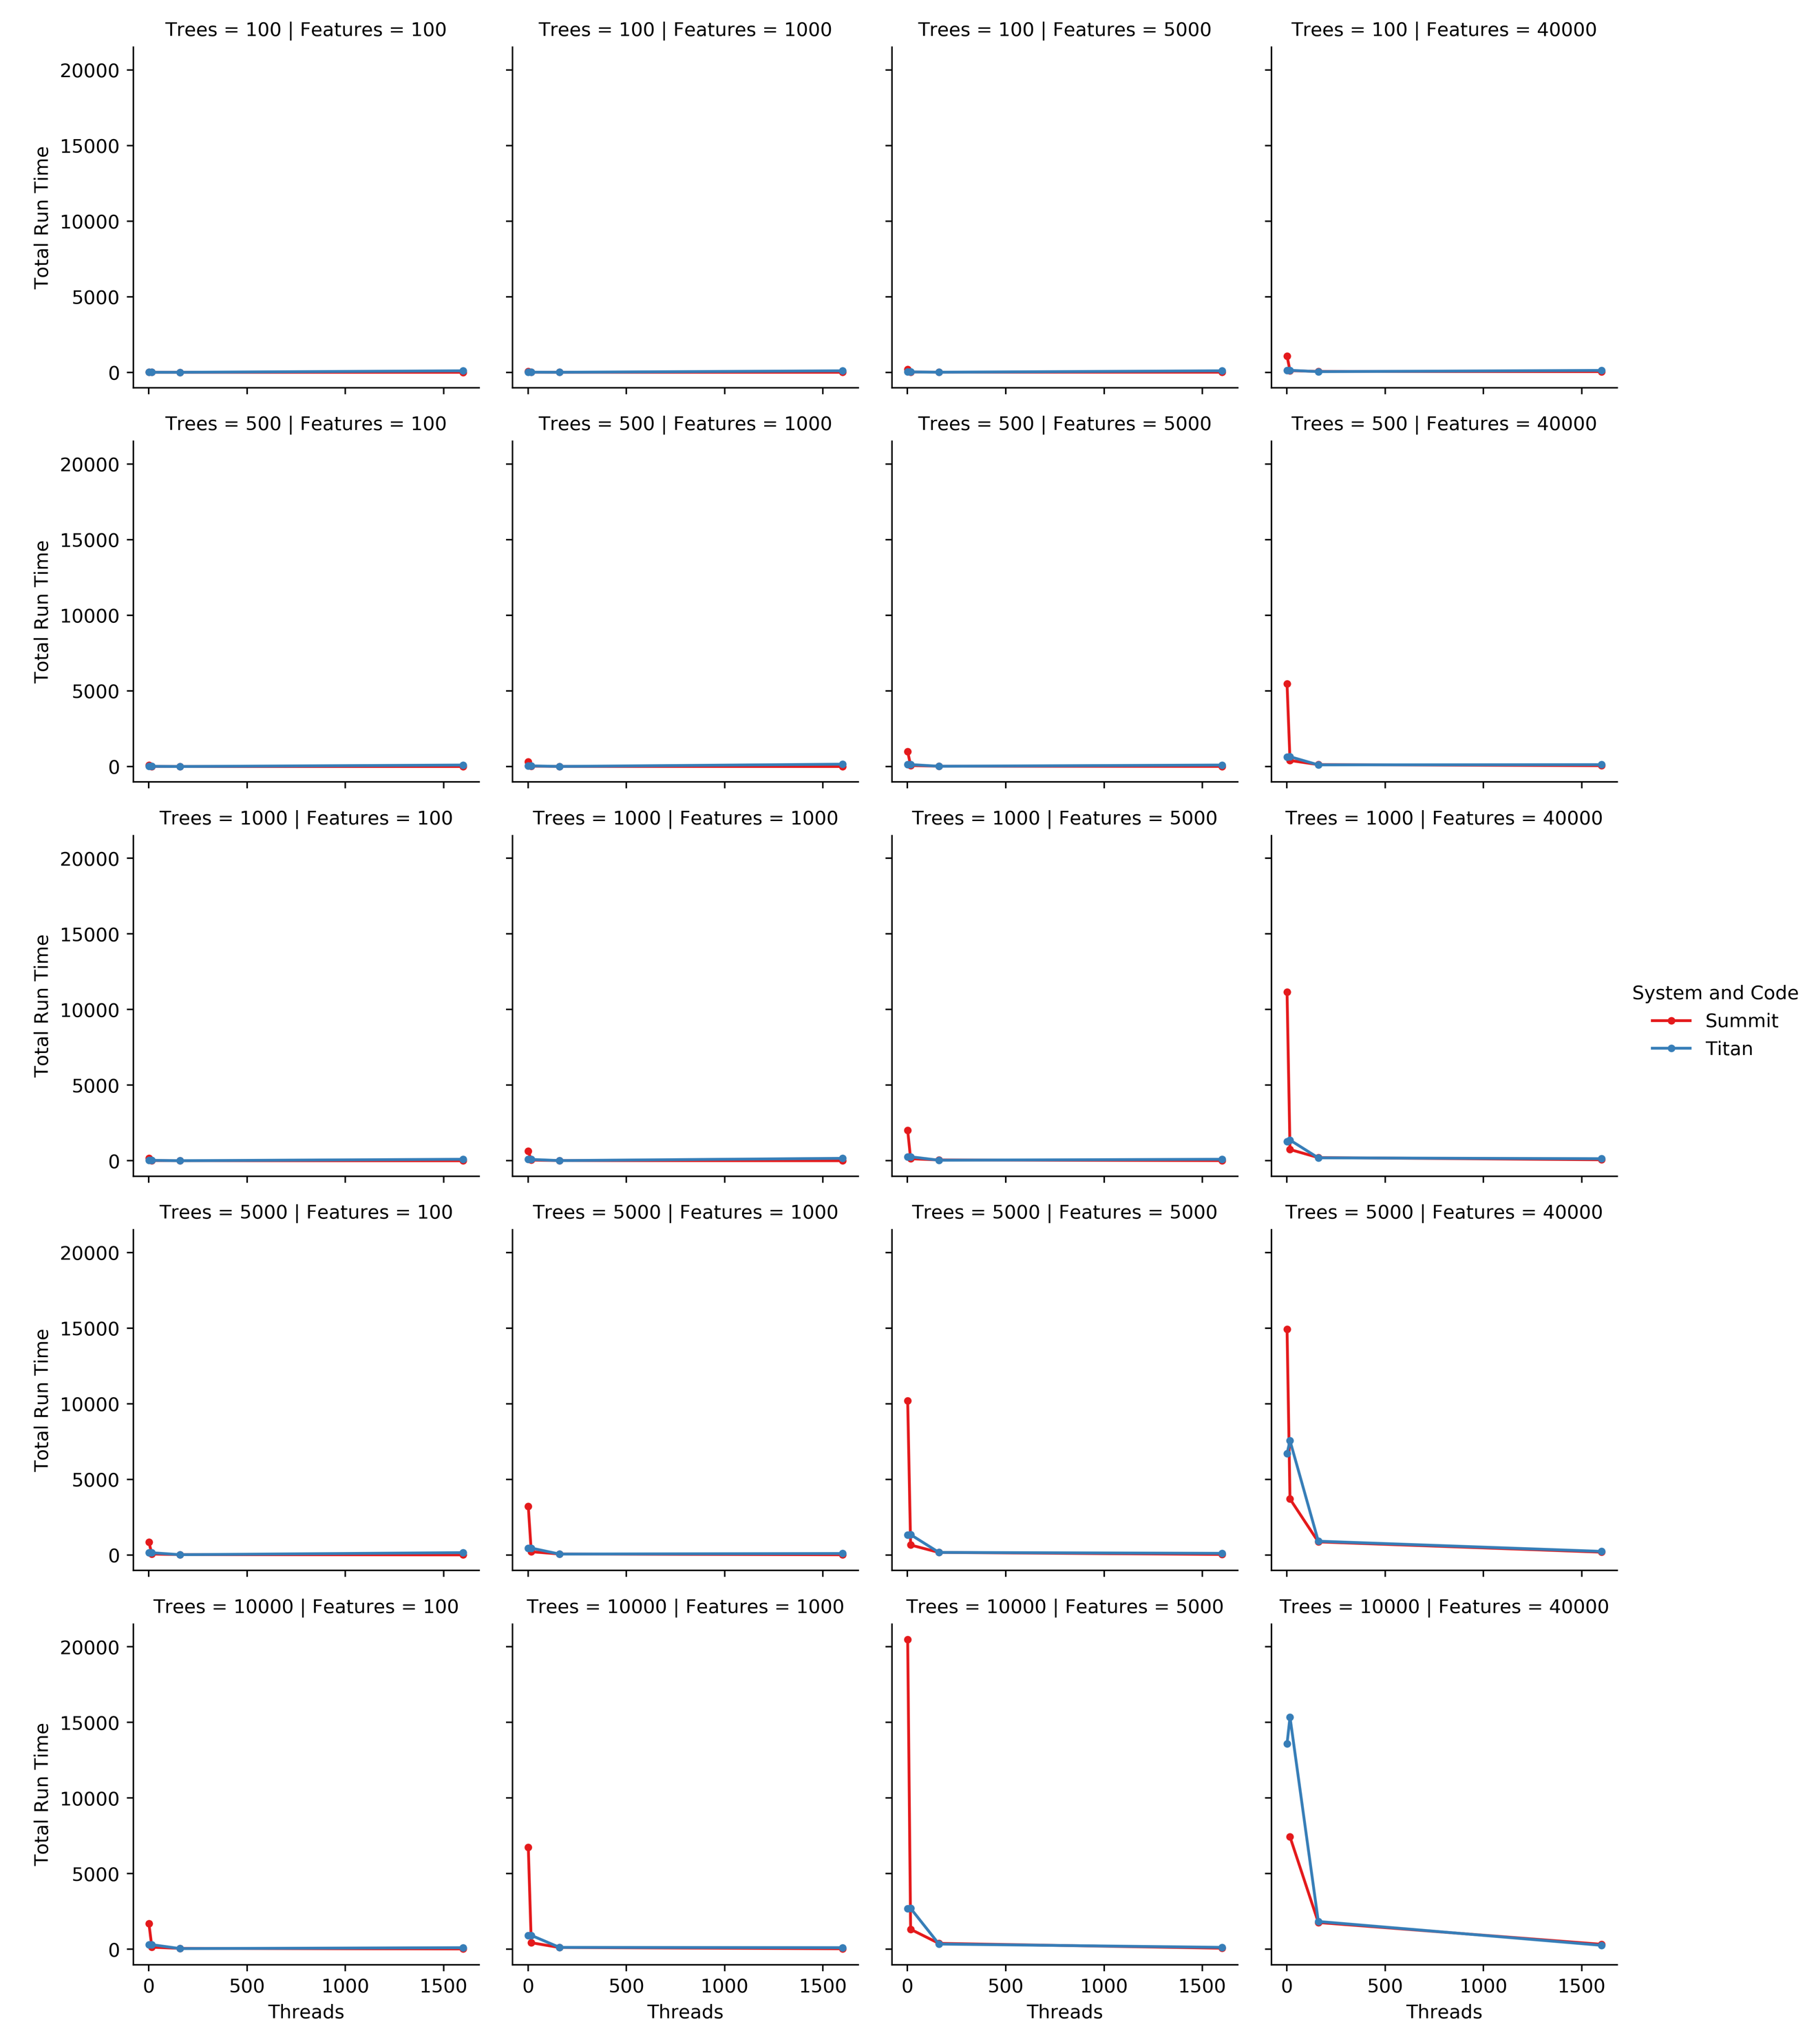


Figure S1: Runtime on HPC Systems. The full grid of graphs comparing Summit and Titan times to completion for the C++ code. The red line is for Summit and the blue line is for Titan.


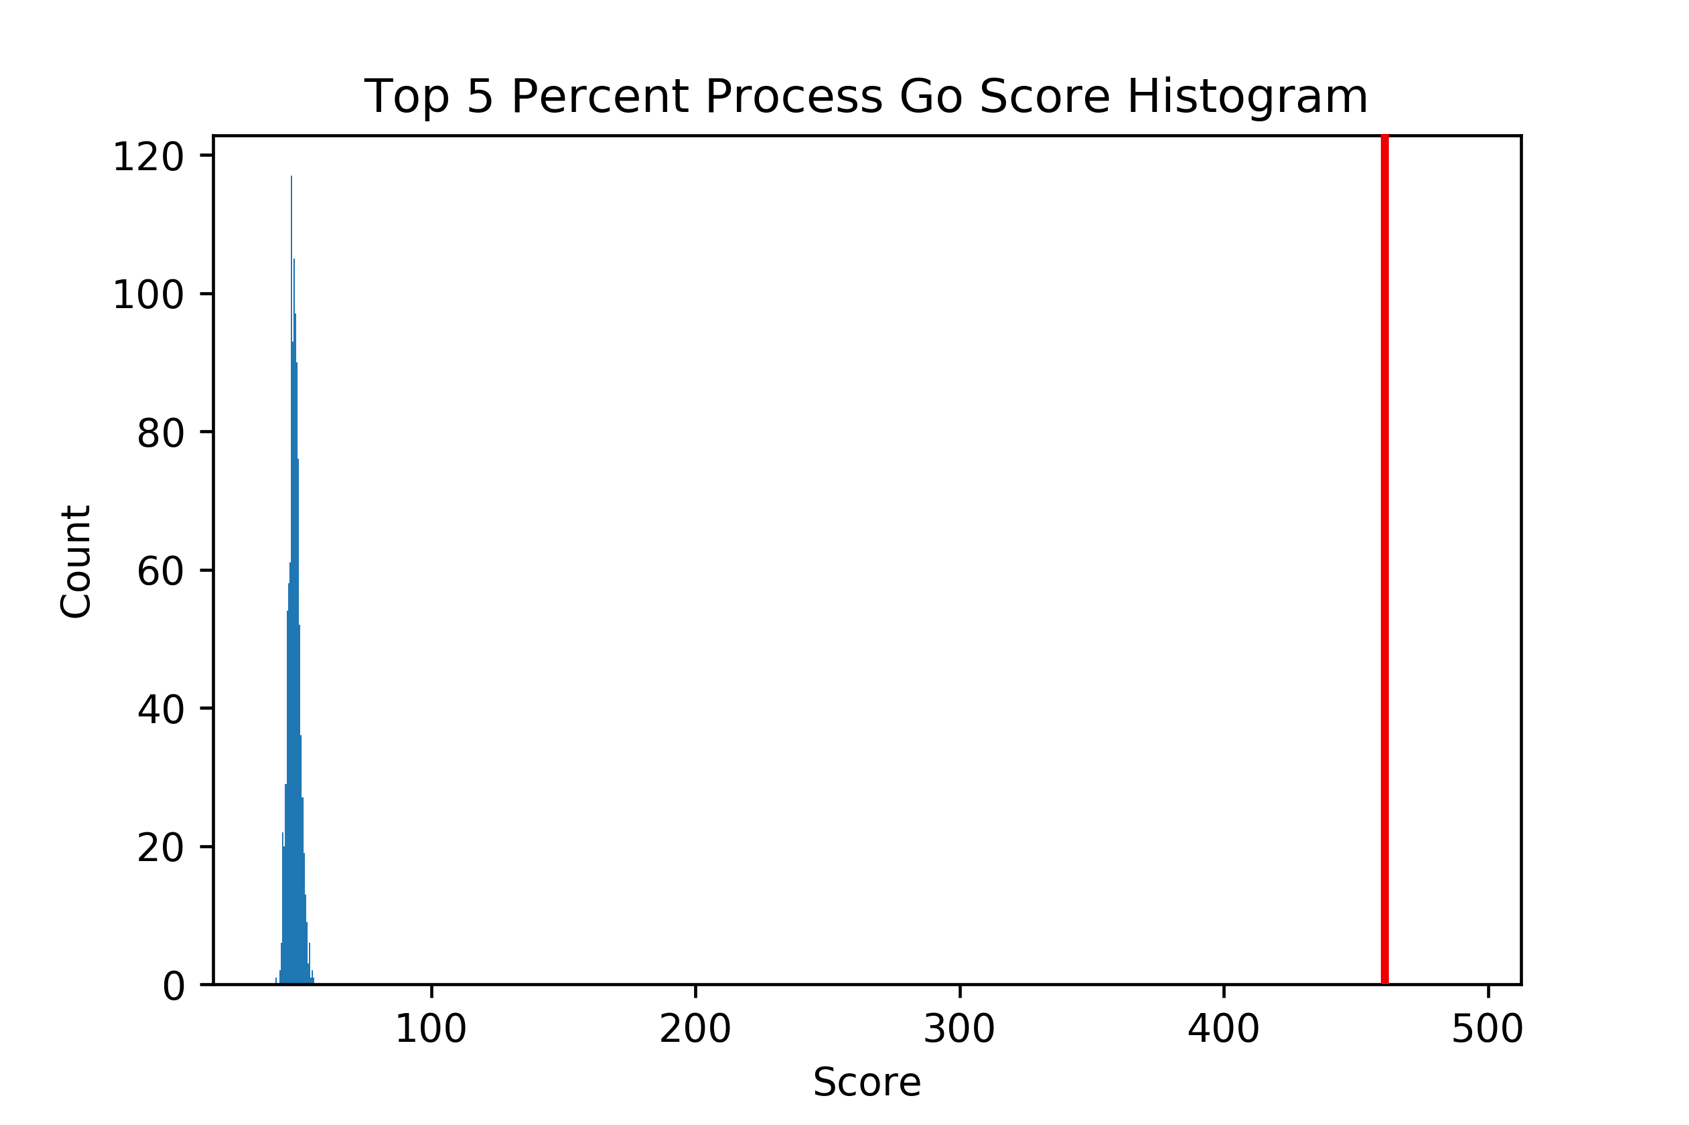

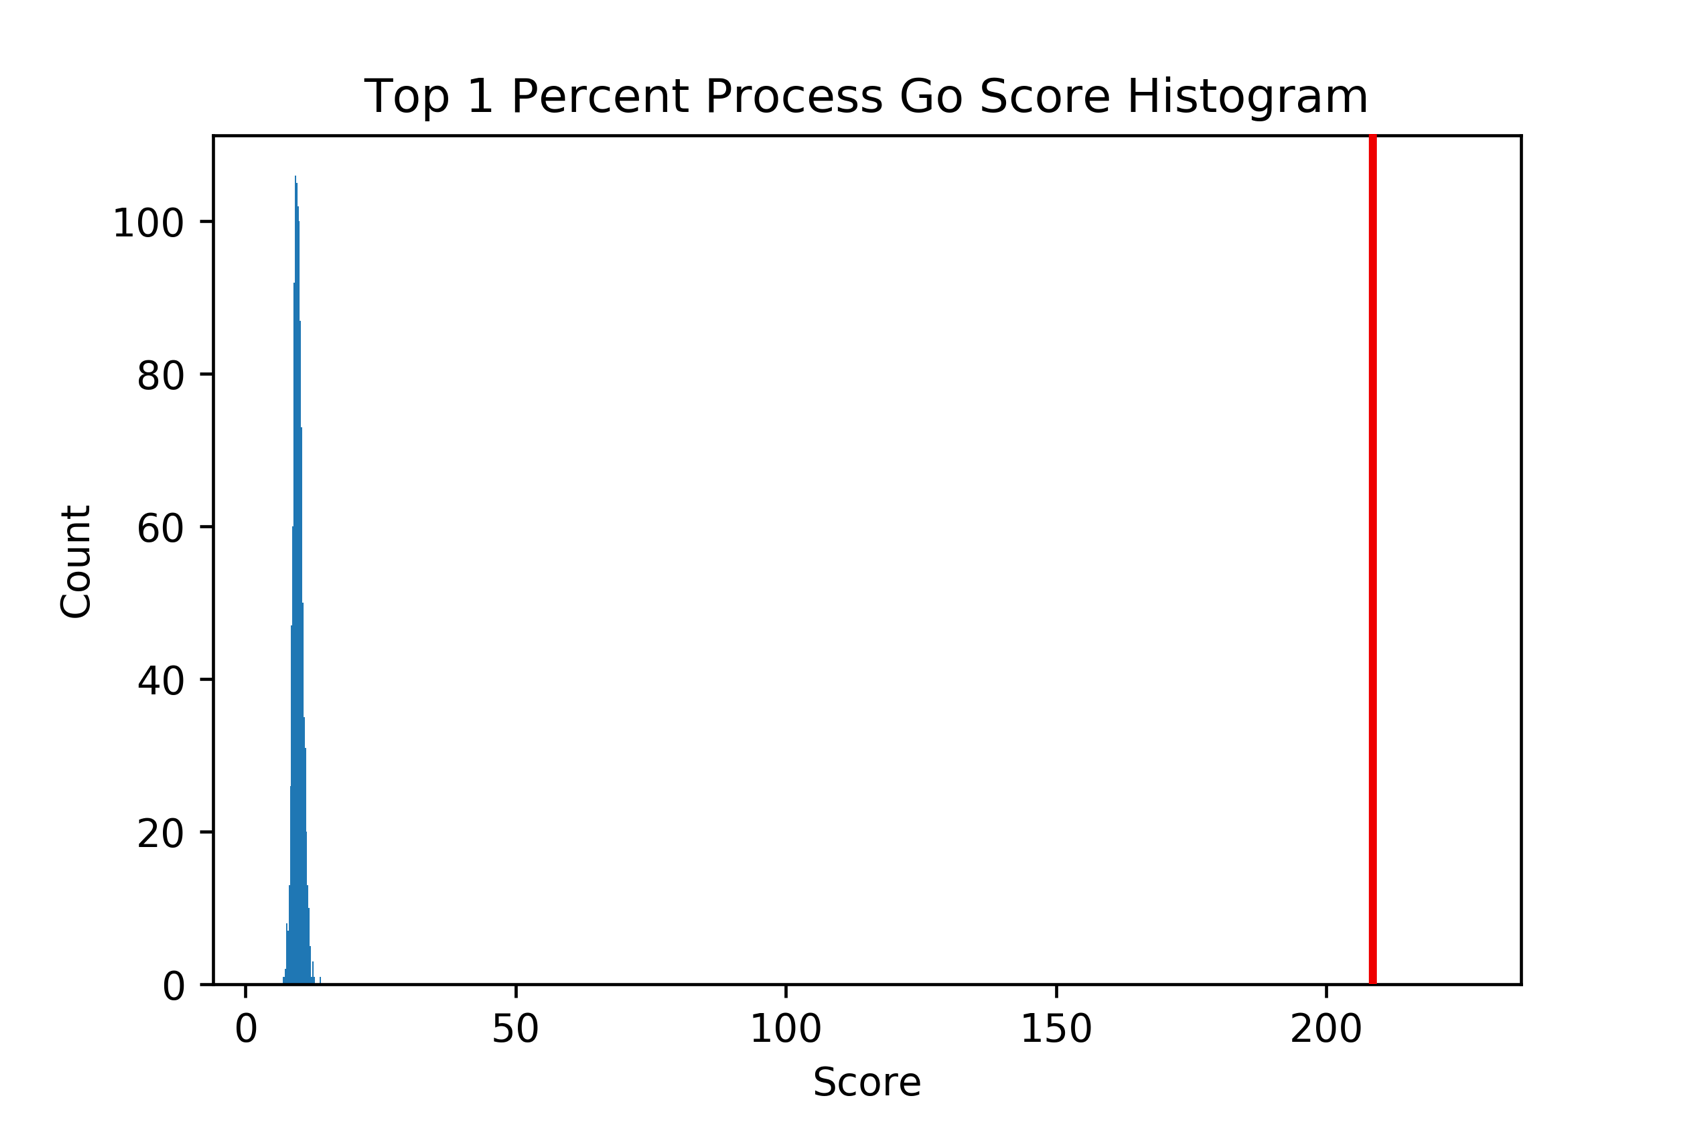


Figure S2: Null Distribution Plots. Null distrubtions with iRF intersect scores in red for the two thresholded Predictive Expression Networks not shown in the main text.


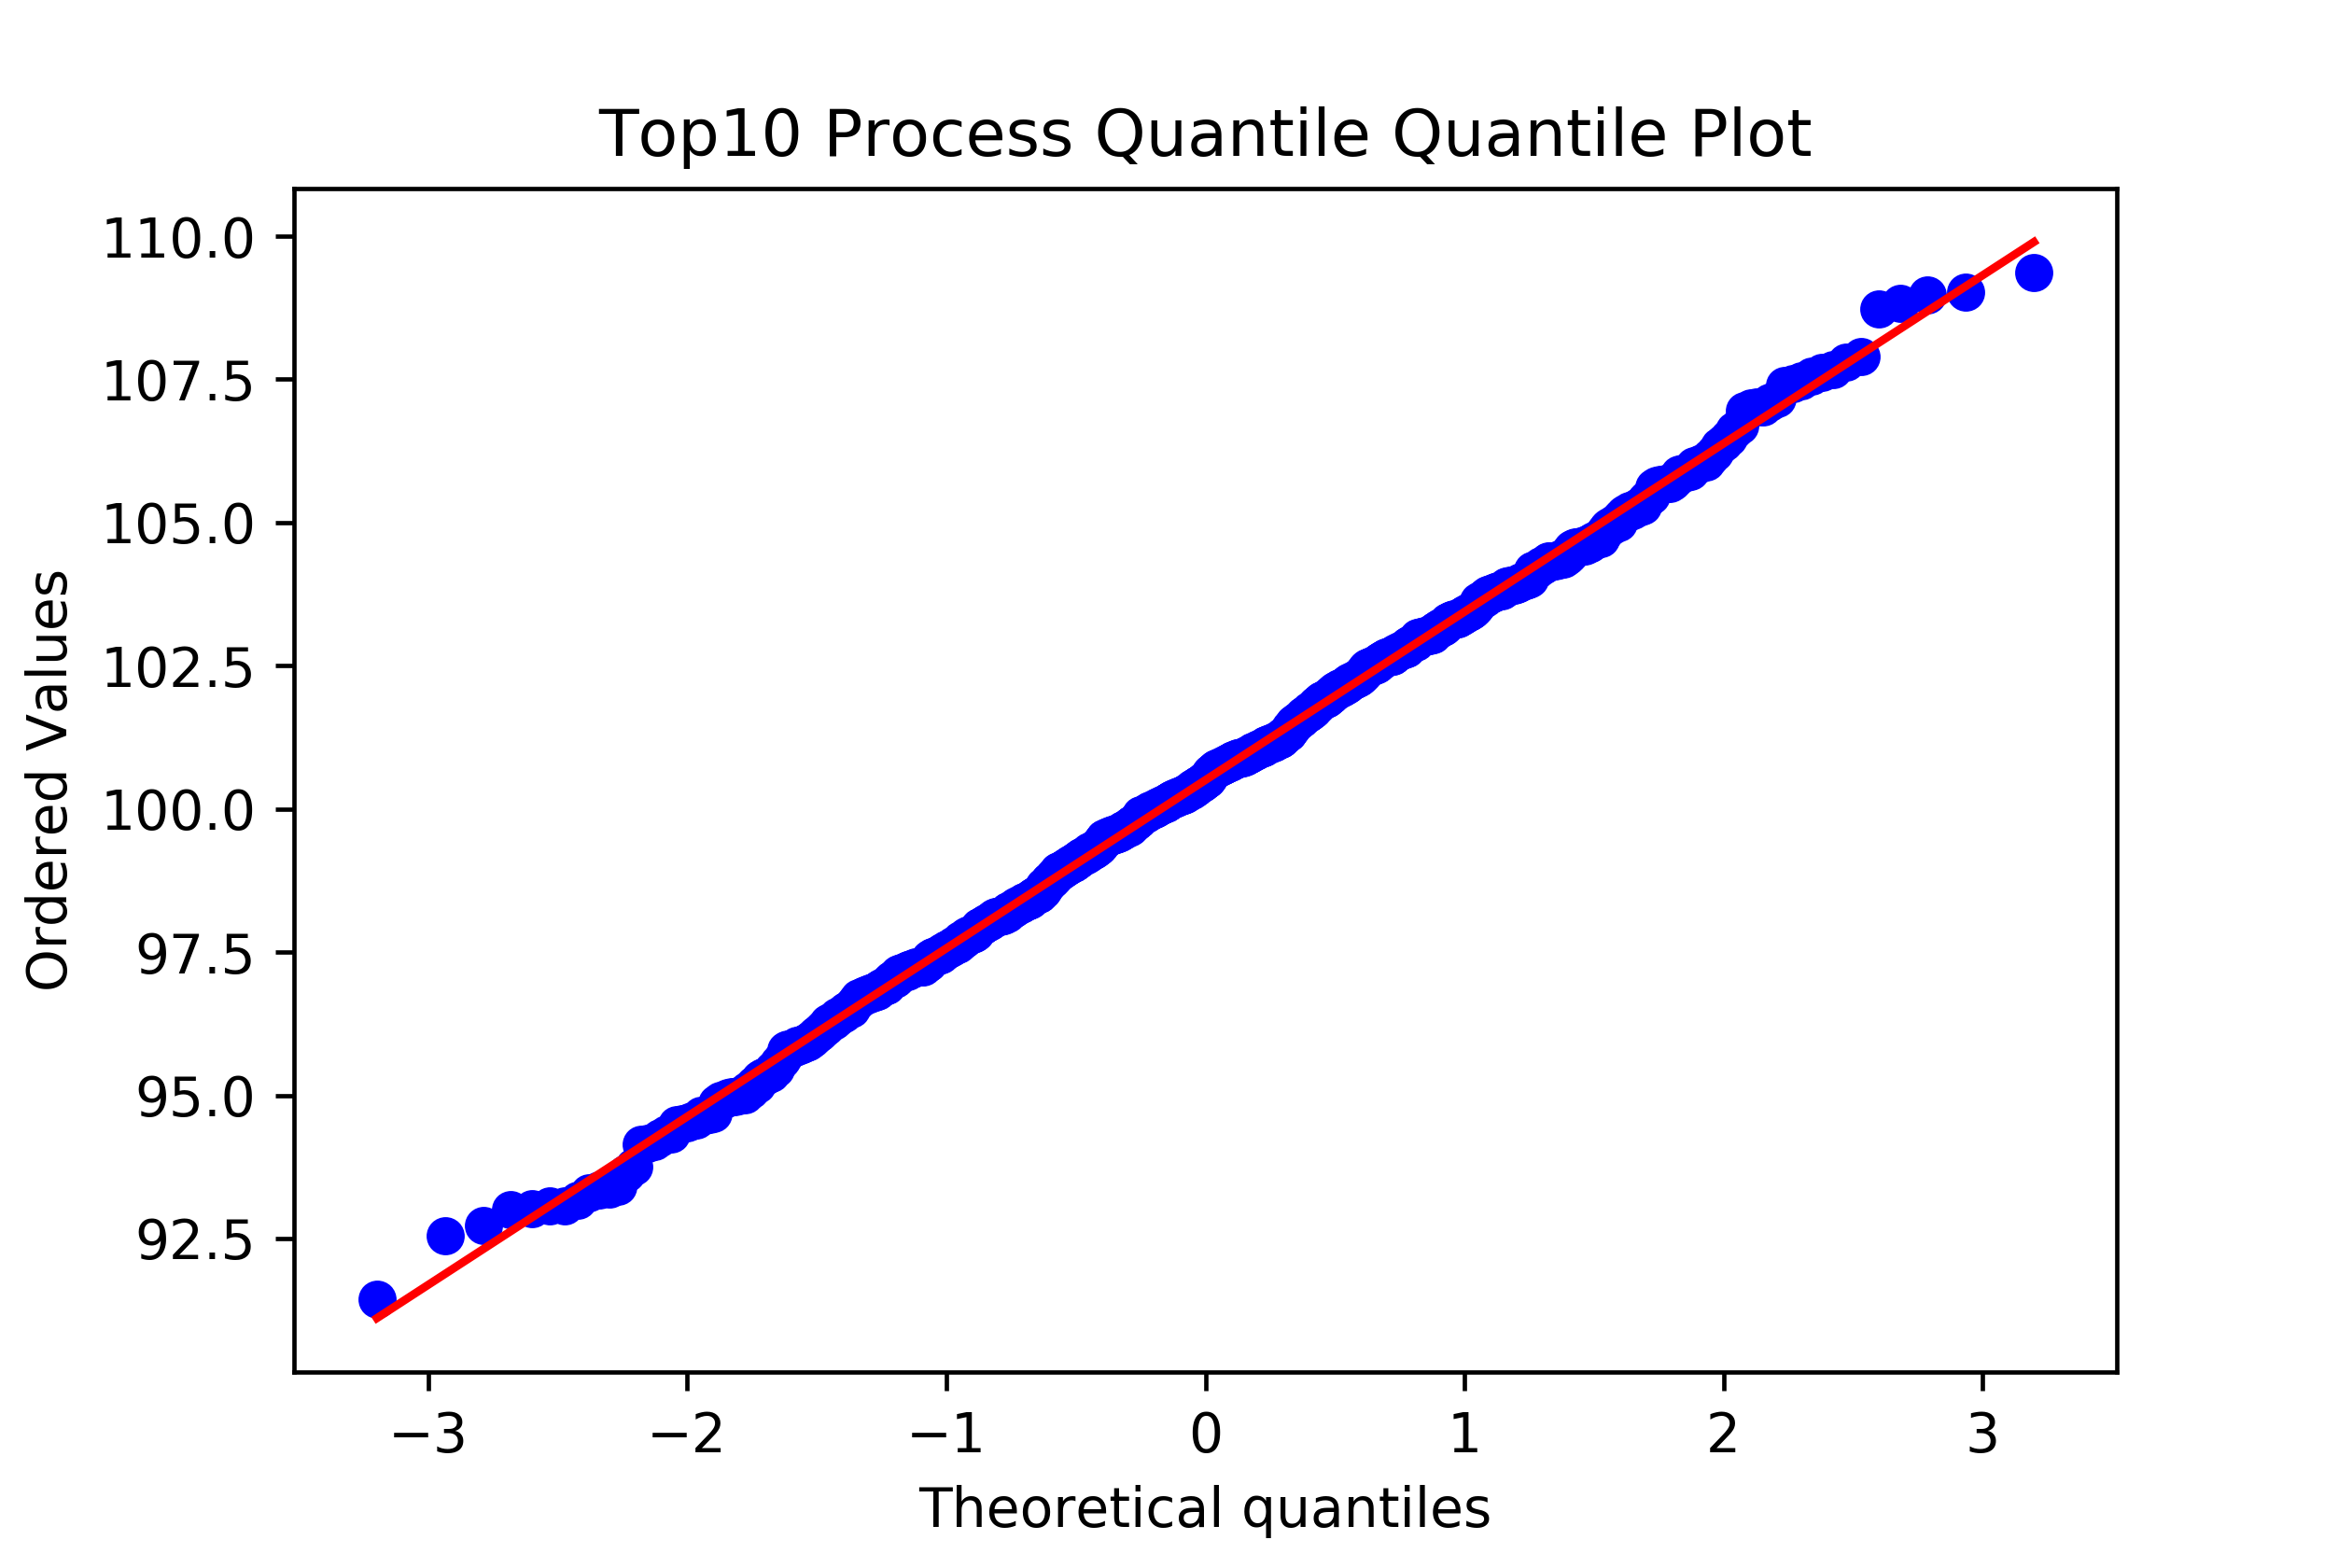

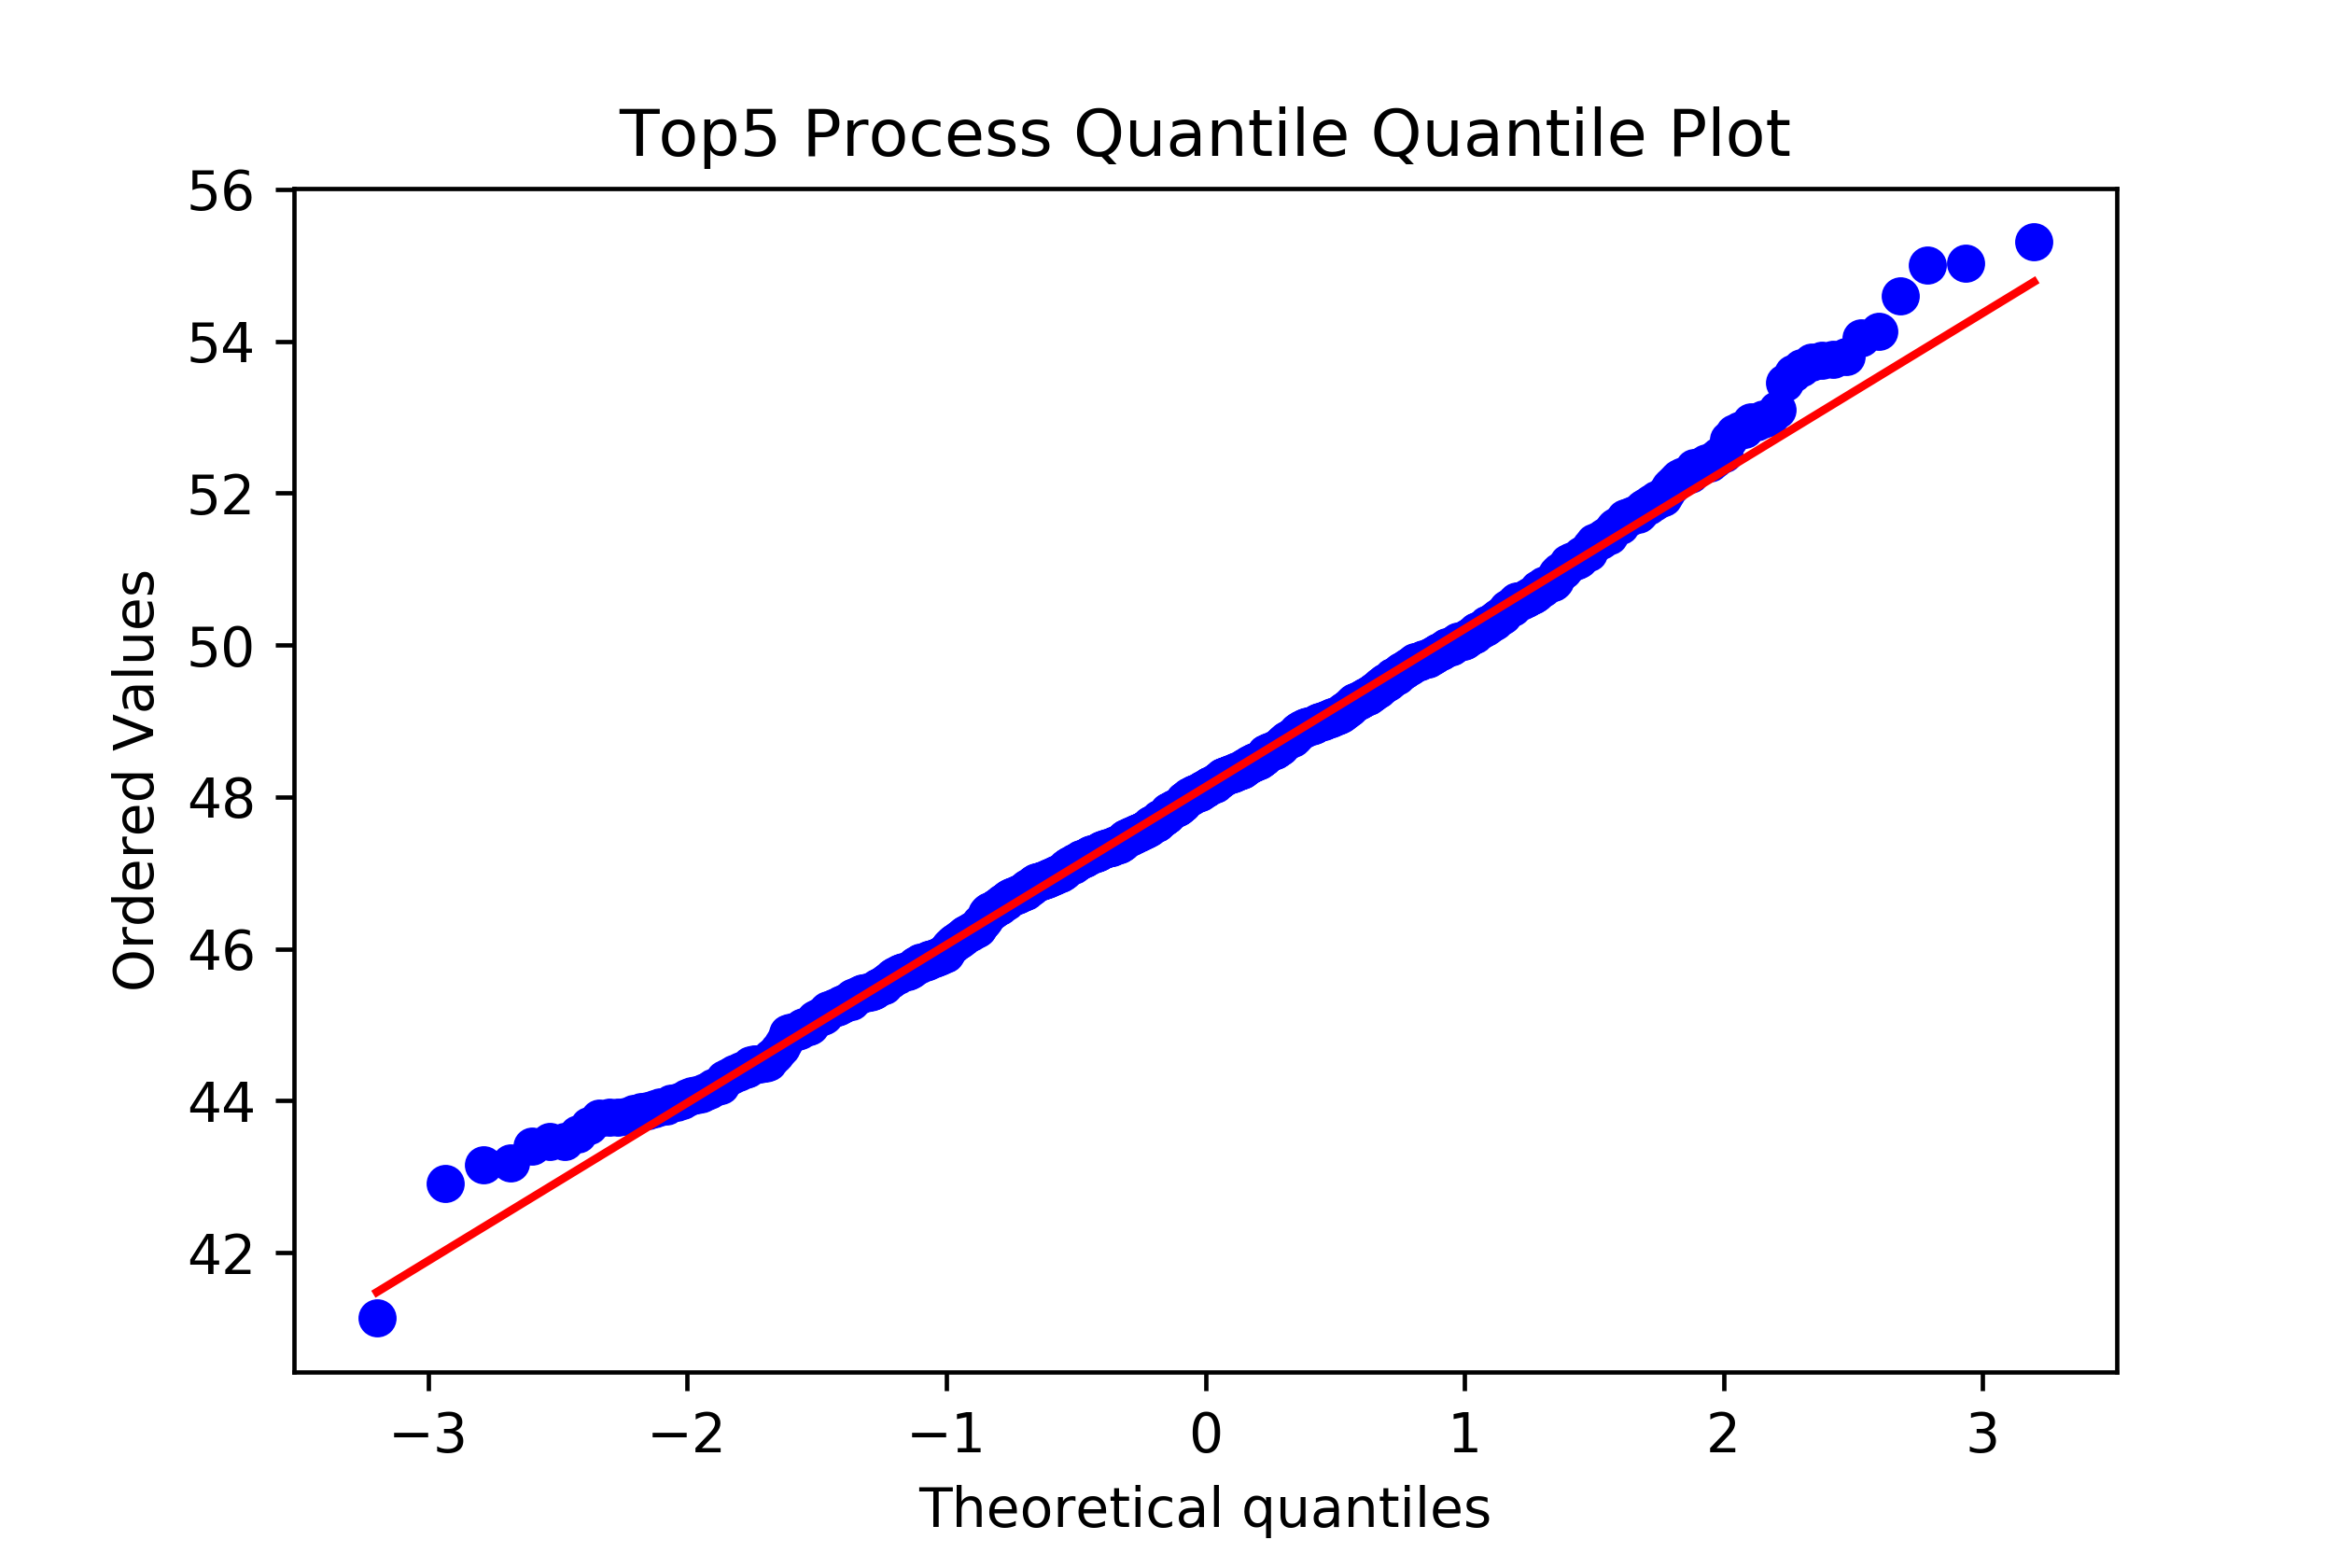


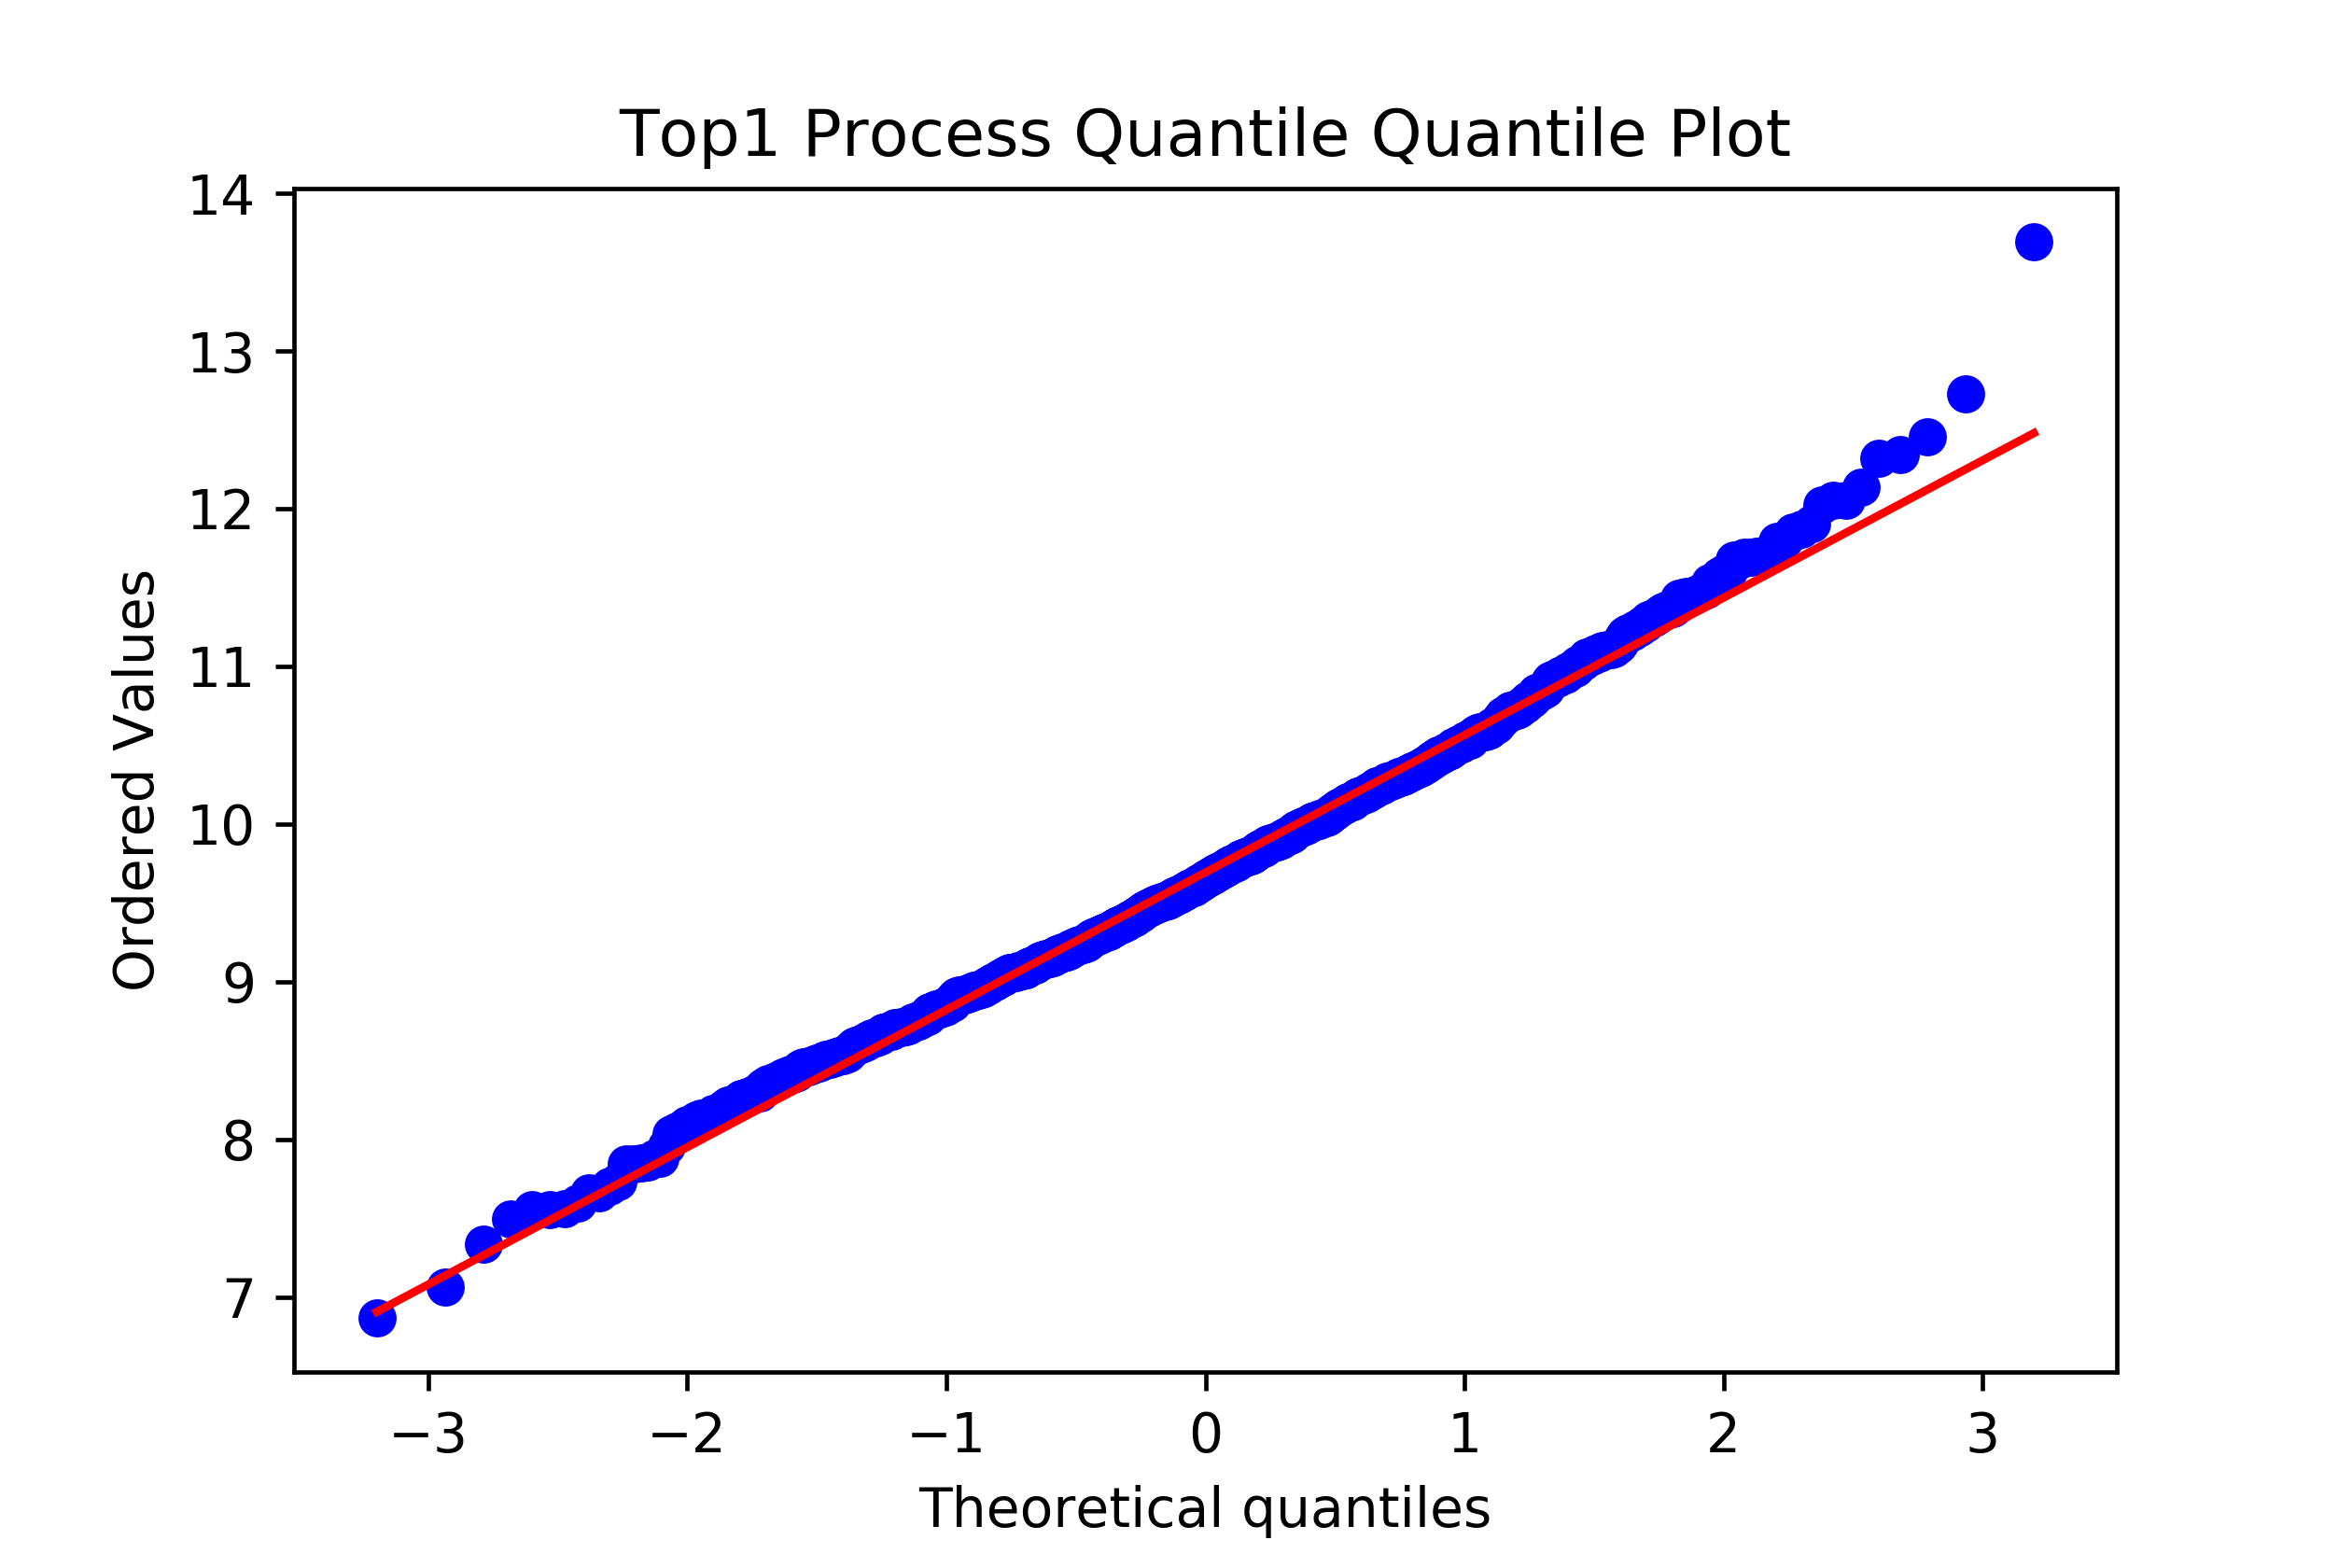

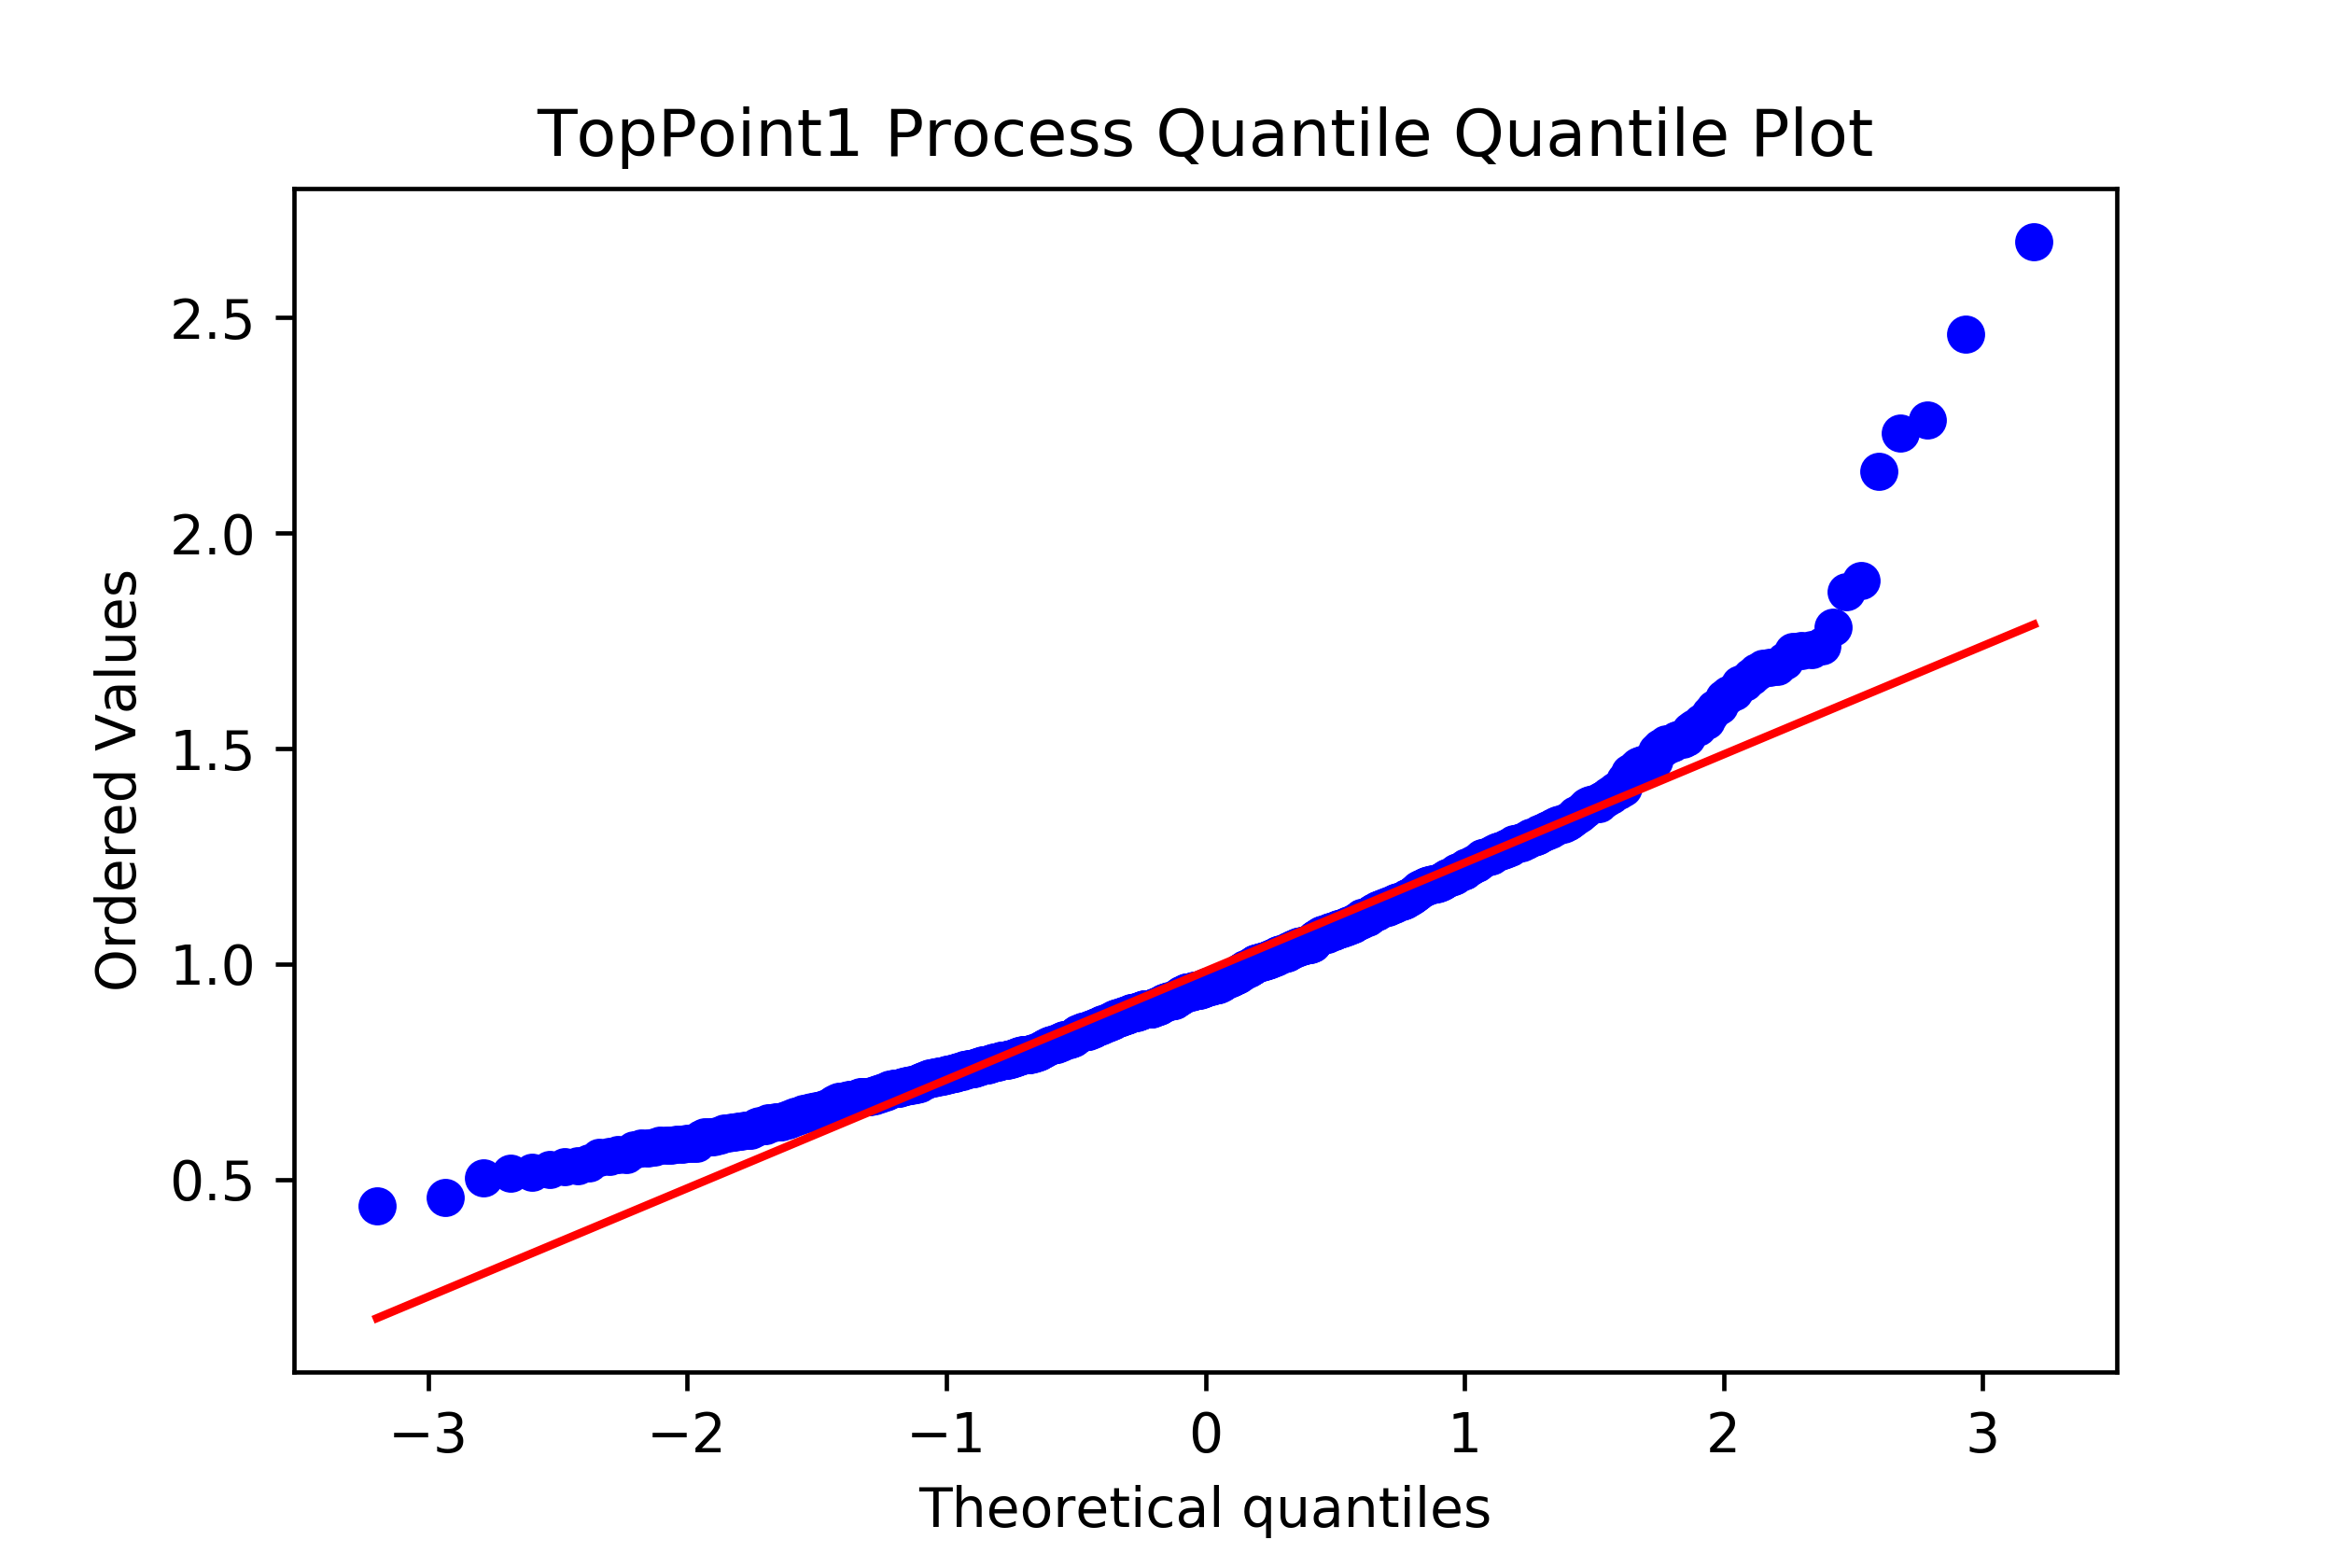


Figure S3: Quantile-Quantile Plots for the PENs. Quantile-quantile plots for each null distribution of the thresholded Predictive Expression Networks.
